# Supplementary material for: Palladium-decorated unconventional graphene oxide for unprecedented hydrogen storage
Source: Royal Society of Chemistry journal article supplement (doi:10.1039/d4ta07170k), 2025-01-01
Supplement: d4ta07170k1.pdf [file d4ta07170k1.pdf]

## Supplementary Data

### **Palladium Decorated Unconventional Graphene Oxide for Unprecedented Hydrogen Storage**

*Shankar Ghotia<sup>1,2</sup>, Seemita Banerjee<sup>3,4</sup>, Asheesh Kumar<sup>3</sup>, Neeraj Dwivedi<sup>1,2</sup>, Avanish Kumar  
Srivastava<sup>1,2</sup>, Pradip Kumar<sup>1,2,\*</sup>*

<sup>1</sup>CSIR-Advanced Materials and Processes Research Institute (AMPRI) Bhopal, Madhya Pradesh 462026, India

<sup>2</sup>Academy of Scientific and Innovative Research (AcSIR), Ghaziabad, Uttar Pradesh 201002, India

<sup>3</sup>Chemistry Division, Bhabha Atomic Research Centre, Mumbai 400085, India

<sup>4</sup>Homi Bhabha National Institute (HBNI), Mumbai 400094, India

\*Corresponding author

Email: [pradip.kg@ampri.res.in](mailto:pradip.kg@ampri.res.in), [pkgangwar84@gmail.com](mailto:pkgangwar84@gmail.com) (Dr. Pradip Kumar)

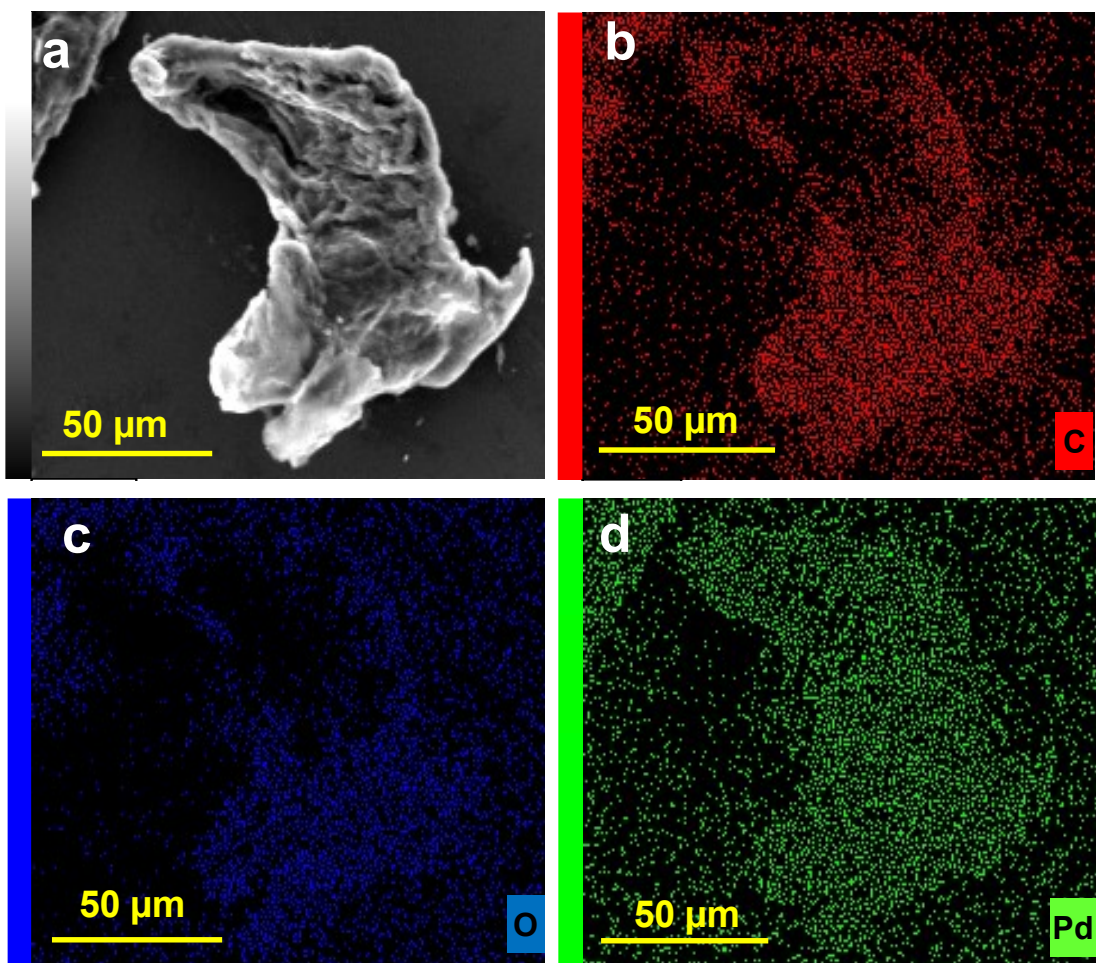

**Figure S1.** Elemental mapping of the Pd-rHGO nanocomposite.

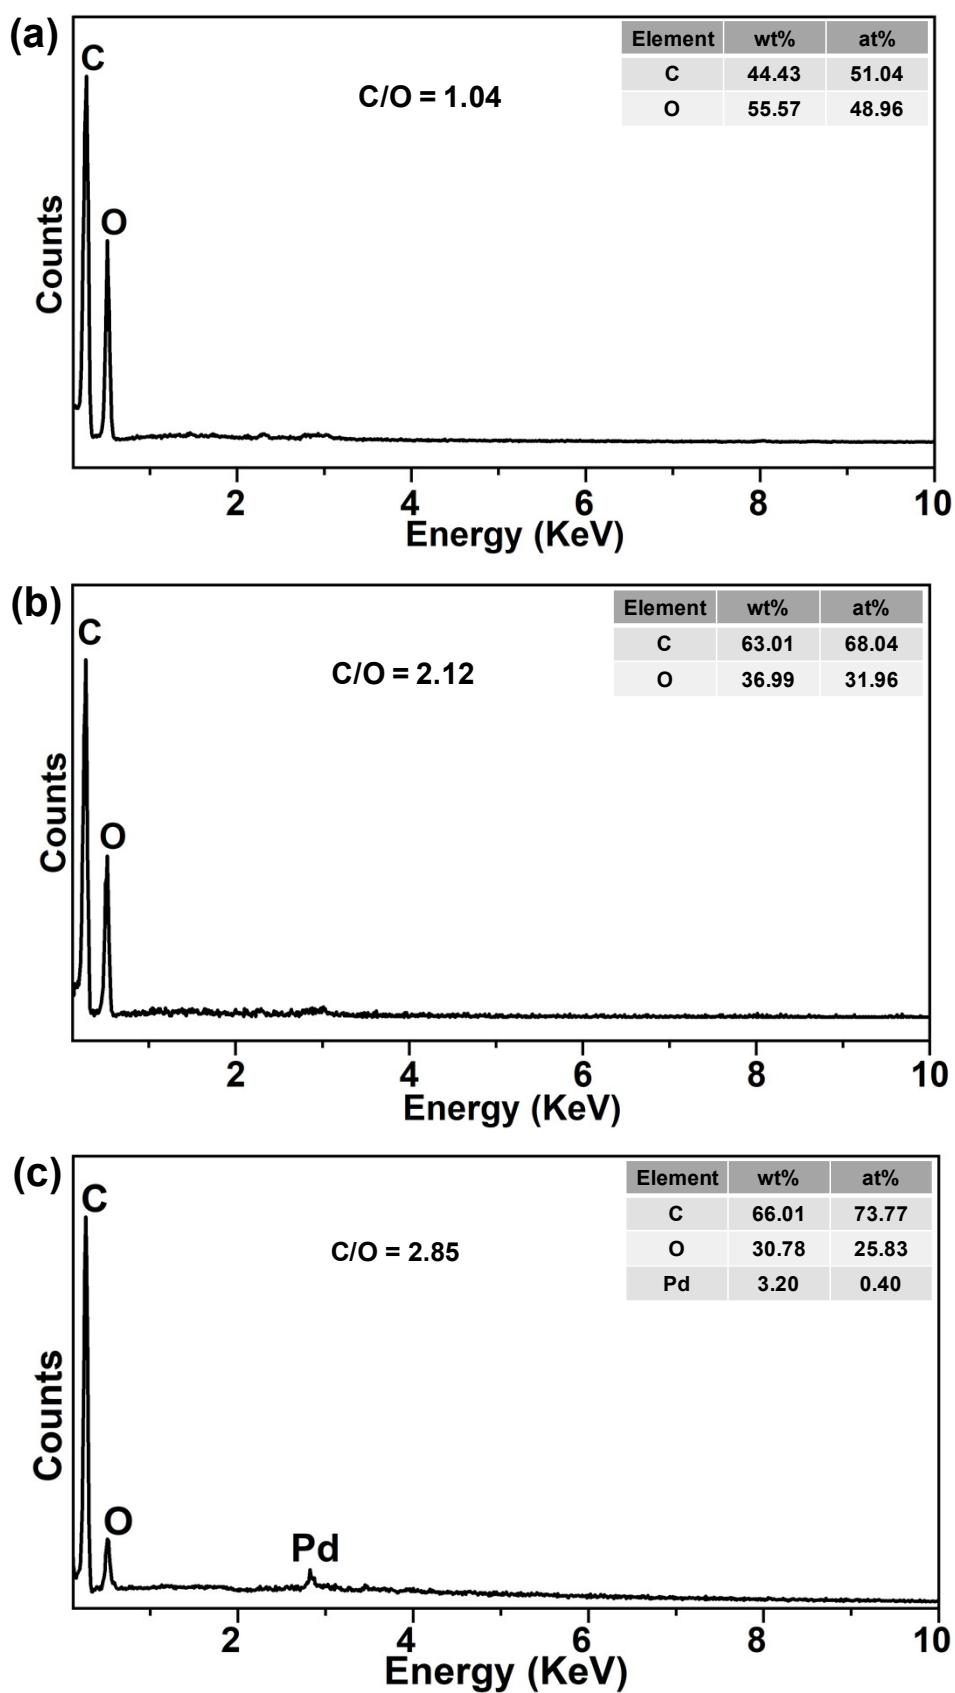

Figure S2. EDX spectra of (a) HGO, (b) conventional GO, and (c) Pd-rGO nanocomposite.

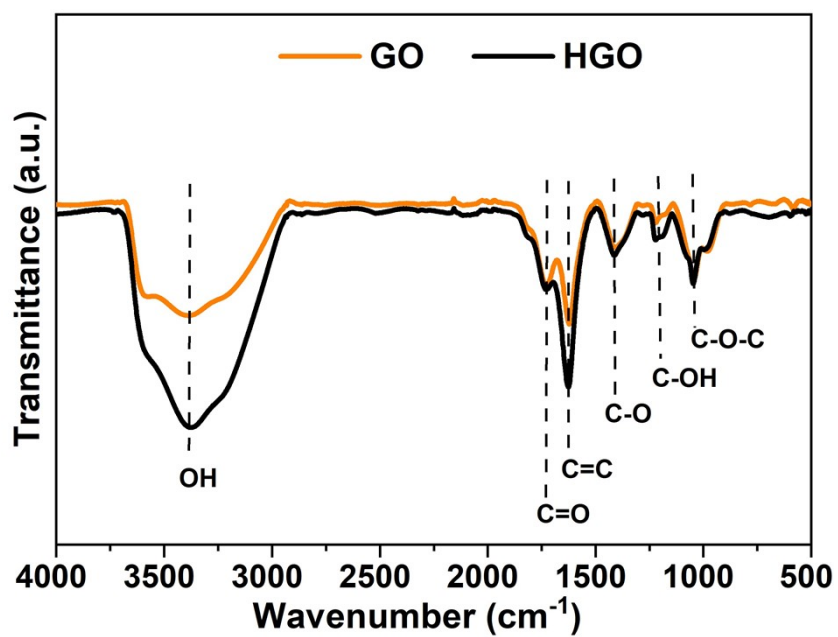

**Figure S3.** FTIR spectra of GO and HGO.
